# Supplementary material for: A Branched Polyelectrolyte Complex Enables Efficient Flame Retardant and Excellent Robustness for Wood/Polymer Composites
Source: PubMed Central journal article supplement (PMC7770577; doi:10.3390/polym12112438), 2020-10-22

Supplementary Materials

# A Branched Polyelectrolyte Complex Enables Efficient Flame Retardant and Excellent Robustness for Wood/Polymer Composites

Yanping Huang<sup>1</sup>, Shuai Zhang<sup>1</sup>, He Chen<sup>1</sup>, Chunxiang Ding<sup>1</sup>, Yan Xuan<sup>2</sup>, Mingzhu Pan<sup>1\*</sup> and Changtong Mei<sup>1\*</sup>

<sup>1</sup> College of Materials Science and Engineering, Nanjing Forestry University, Nanjing 210037, China; yanpinghuang@njfu.edu.cn (Y.H.); zhangshuai1994@126.com (S.Z.); 13770711109@163.com (H.C.); ding\_chunxiang@126.com (C.D.)

<sup>2</sup> Advanced Analysis and Testing Center, Nanjing Forestry University, Nanjing 210037, China; xuanyannfu@njfu.edu.cn (Y.X.)

\* Correspondence: mzpan@njfu.edu.cn (M.P.); mei@njfu.edu.cn (C.M.)

**Table S1.** Formulation of WPCs with and APP and PECs (wt%).

| Samples     | HDPE | Wood fibers | Flame retardants |
|-------------|------|-------------|------------------|
| WPC         | 70   | 30          | 0                |
| WPC/APP 15% | 55   | 30          | 15               |
| WPC/PEC 15% | 55   | 30          | 15               |
| WPC/PEC 20% | 50   | 30          | 20               |
| WPC/PEC 25% | 45   | 30          | 25               |

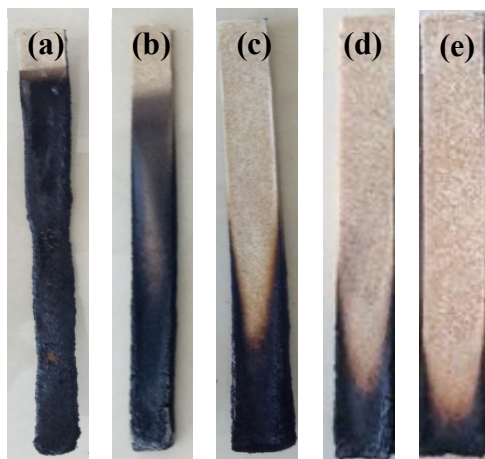

**Figure S1.** Digital photos of (a) WPC, (b) WPC/APP 15%, (c) WPC/PEC 15%, (d) WPC/PEC 20%, and (e) WPC/PEC 25% from vertical burning test (UL-94).

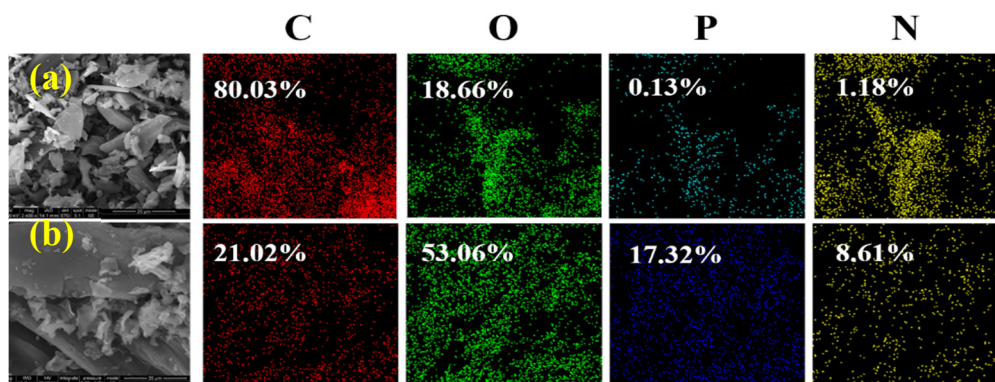

Figure S2. EDX pattern of the char residues from CCT: (a) WPC and (b) WPC/APP 15%. The scale bar of SEM was 10 $\mu$ m.

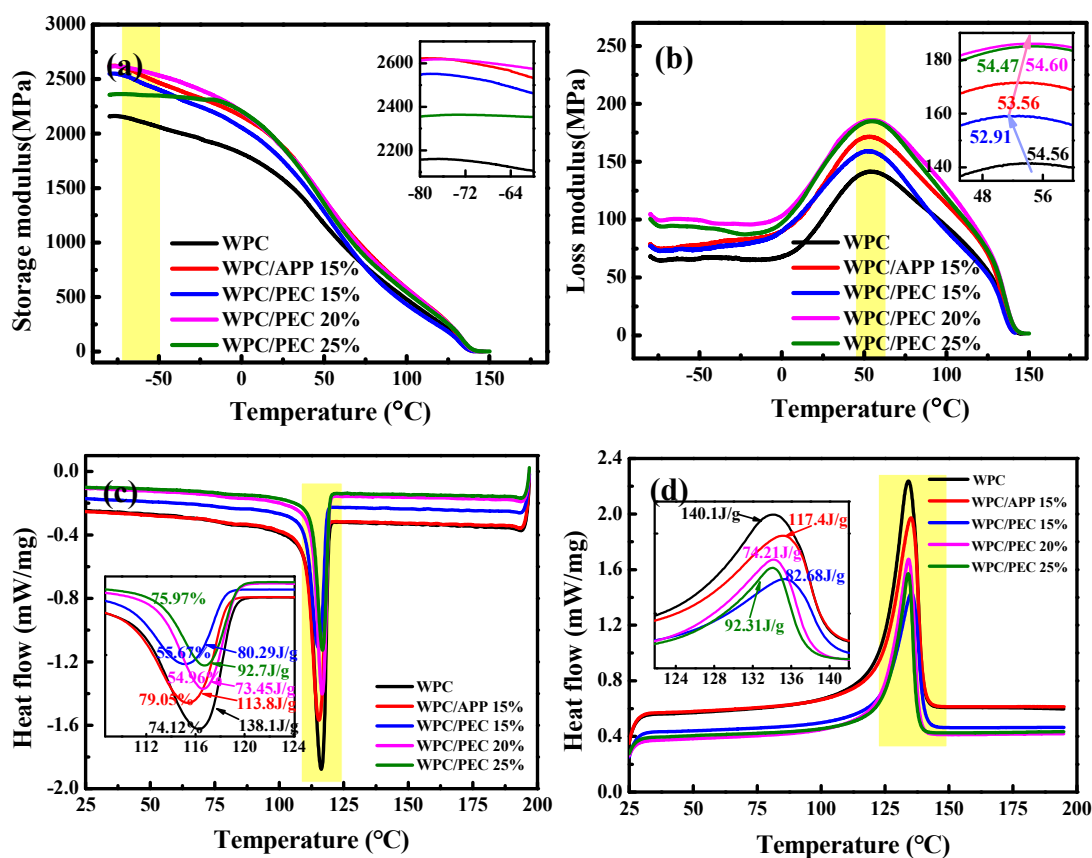

Figure S3. Thermomechanical results: DMA curves of WPC with APP and PEC. (a) storage modulus ( $E'$ ) and (b) loss modulus ( $E''$ ). DSC curves of WPC with 15% APP and PEC. (c) cooling and (d) second heating.

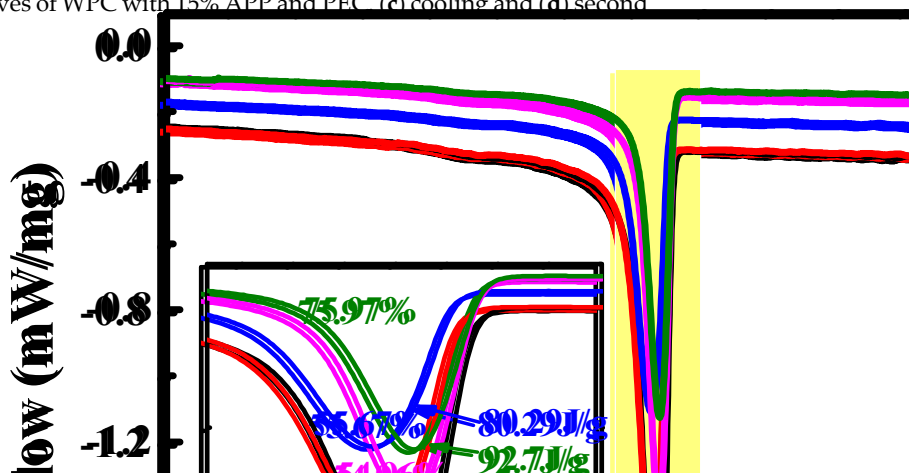

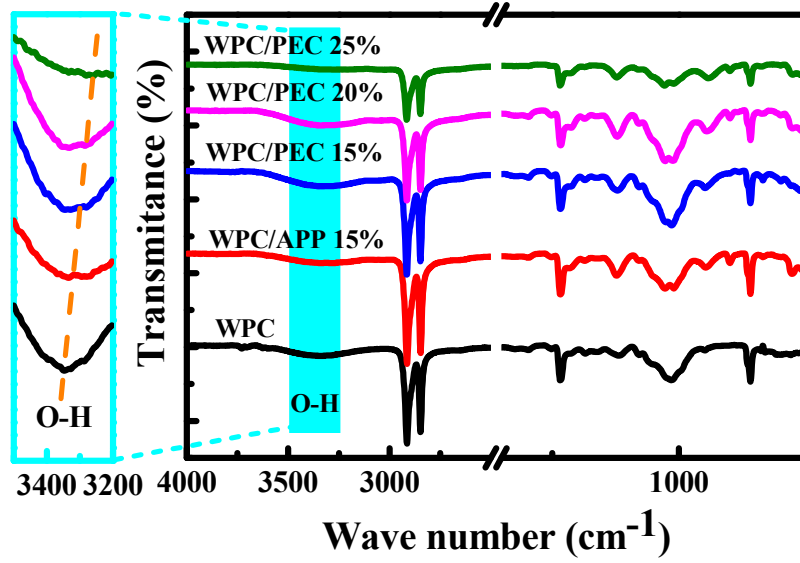

Figure S4. FTIR spectra of WPC/PEC composites.

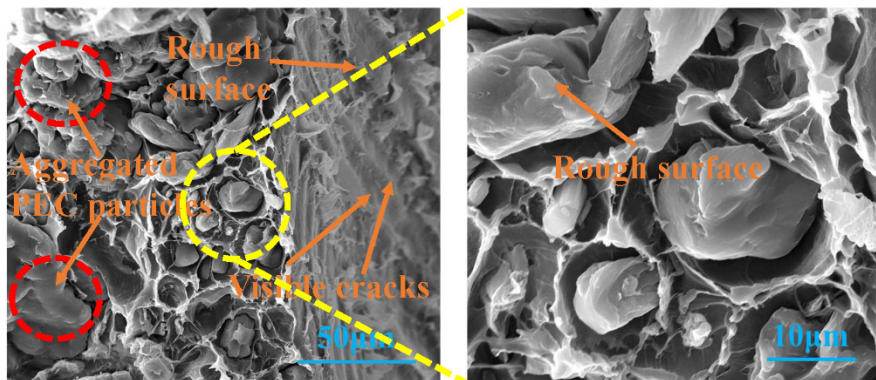

Figure S5. Fractural SEM images of WPC/PEC 20%.

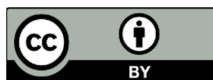

© 2020 by the authors. Licensee MDPI, Basel, Switzerland. This article is an open access article distributed under the terms and conditions of the Creative Commons Attribution (CC BY) license (<http://creativecommons.org/licenses/by/4.0/>).

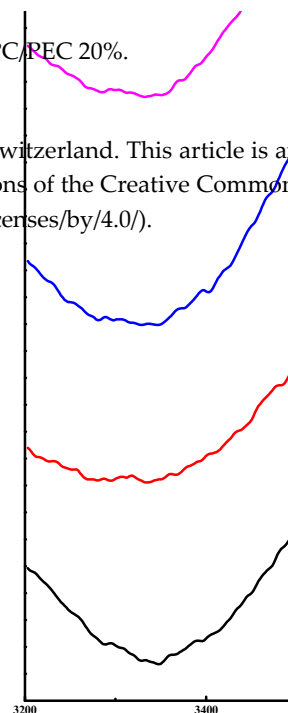

Supplement: polymers-12-02438-s001.pdf [file polymers-12-02438-s001.pdf]
